# Supplementary material
Source: PubMed Central journal article supplement (PMC5783651)
Supplement: EHP1021.s001.acco.pdf [file EHP1021.s001.acco.pdf]

**Note to readers with disabilities:** *EHP* strives to ensure that all journal content is accessible to all readers. However, some figures and Supplemental Material published in *EHP* articles may not conform to [508 standards](#) due to the complexity of the information being presented. If you need assistance accessing journal content, please contact [ehp508@niehs.nih.gov](mailto:ehp508@niehs.nih.gov). Our staff will work with you to assess and meet your accessibility needs within 3 working days.

### **Supplemental Material**

#### **Urinary Concentrations of Organophosphate Flame Retardant Metabolites and Pregnancy Outcomes among Women Undergoing in Vitro Fertilization**

Courtney C. Carignan, Lidia Mínguez-Alarcón, Craig M. Butt, Paige L. Williams, John D. Meeker, Heather M. Stapleton, Thomas L. Toth, Jennifer B. Ford, and Russ Hauser, for the EARTH Study Team

#### **Table of Contents**

**Table S1.** Unadjusted mean (95% CI) proportion of cycles resulting in implantation, live birth and clinical pregnancy by quartile of urinary organophosphate flame retardant metabolite concentrations among 211 women undergoing 297 IVF cycles.

**Table S2:** Adjusted mean (95% CI) proportion of cycles resulting in implantation, live birth and clinical pregnancy by quartile of the molar sum of the urinary organophosphate flame retardant metabolite concentrations ( $\Sigma$ PFRs).

**Table S3.** Unadjusted means (95% CI) for early developmental outcomes by quartile of urinary organophosphate flame retardant metabolite concentrations among 205 women undergoing 281 IVF cycles that had oocyte retrieval.

**Table S4.** Comparison of GM (95% CI) concentrations of urinary organophosphate flame retardant metabolites ( $\mu\text{g/L}$ ).

#### **REFERENCES**

**Table S1.** Unadjusted mean (95% CI) proportion of cycles resulting in implantation, live birth and clinical pregnancy by quartile of urinary organophosphate flame retardant metabolite concentrations among 211 women undergoing 297 IVF cycles.

|                     | ΣPFRs              | BDCIPP            | DPHP               | ip-DPHP            |
|---------------------|--------------------|-------------------|--------------------|--------------------|
| <b>Implantation</b> |                    |                   |                    |                    |
| Q1                  | 0.70 (0.58, 0.80)  | 0.71 (0.59, 0.81) | 0.67 (0.55, 0.77)  | 0.74 (0.62, 0.83)  |
| Q2                  | 0.60 (0.48, 0.71)  | 0.59 (0.47, 0.7)  | 0.63 (0.51, 0.74)  | 0.49 (0.38, 0.61)  |
| Q3                  | 0.57 (0.45, 0.68)  | 0.53 (0.41, 0.64) | 0.56 (0.44, 0.68)  | 0.61 (0.49, 0.71)  |
| Q4                  | 0.50 (0.38, 0.62)* | 0.55 (0.43, 0.66) | 0.51 (0.39, 0.62)  | 0.53 (0.41, 0.65)* |
| p-trend             | 0.02               | 0.05              | 0.04               | 0.06               |
| <b>Pregnancy</b>    |                    |                   |                    |                    |
| Q1                  | 0.63 (0.51, 0.74)  | 0.61 (0.49, 0.72) | 0.60 (0.48, 0.71)  | 0.63 (0.51, 0.73)  |
| Q2                  | 0.52 (0.40, 0.64)  | 0.51 (0.39, 0.62) | 0.54 (0.42, 0.65)  | 0.41 (0.30, 0.53)  |
| Q3                  | 0.49 (0.37, 0.61)  | 0.46 (0.34, 0.58) | 0.48 (0.37, 0.60)  | 0.51 (0.39, 0.63)  |
| Q4                  | 0.39 (0.28, 0.51)* | 0.45 (0.34, 0.57) | 0.41 (0.30, 0.53)* | 0.48 (0.36, 0.59)  |
| p-trend             | 0.007              | 0.05              | 0.02               | 0.17               |
| <b>Live birth</b>   |                    |                   |                    |                    |
| Q1                  | 0.49 (0.37, 0.61)  | 0.50 (0.38, 0.62) | 0.46 (0.34, 0.58)  | 0.52 (0.40, 0.64)  |
| Q2                  | 0.40 (0.29, 0.53)  | 0.37 (0.26, 0.50) | 0.42 (0.31, 0.54)  | 0.36 (0.25, 0.48)  |
| Q3                  | 0.38 (0.27, 0.50)  | 0.37 (0.26, 0.49) | 0.39 (0.28, 0.52)  | 0.37 (0.26, 0.49)  |
| Q4                  | 0.34 (0.24, 0.46)  | 0.37 (0.26, 0.49) | 0.34 (0.24, 0.46)  | 0.36 (0.25, 0.48)  |
| p-trend             | 0.09               | 0.16              | 0.17               | 0.07               |

\*Significantly different from Q1 at the p=0.05 level

**Table S2: Adjusted mean (95% CI) proportion of cycles resulting in implantation, live birth and clinical pregnancy by quartile of the molar sum of the urinary organophosphate flame retardant metabolite concentrations ( $\Sigma$ PFRs).**

|                     | Restricted to Cycles with Successful Oocyte Retrieval <sup>a</sup> | Restricted to First IVF Cycle <sup>b</sup> | Restricted to Nulliparous Women <sup>c</sup> | Controlling for maternal year of birth <sup>d</sup> |
|---------------------|--------------------------------------------------------------------|--------------------------------------------|----------------------------------------------|-----------------------------------------------------|
| <b>Implantation</b> |                                                                    |                                            |                                              |                                                     |
| Q1                  | 0.75 (0.62, 0.84)                                                  | 0.71 (0.39, 0.91)                          | 0.77 (0.61, 0.87)                            | 0.71 (0.59, 0.81)                                   |
| Q2                  | 0.66 (0.53, 0.77)                                                  | 0.66 (0.35, 0.88)                          | 0.62 (0.46, 0.76)                            | 0.61 (0.49, 0.73)                                   |
| Q3                  | 0.55 (0.42, 0.67)                                                  | 0.57 (0.27, 0.83)                          | 0.53 (0.38, 0.68)                            | 0.57 (0.45, 0.69)                                   |
| Q4                  | 0.59 (0.46, 0.71)                                                  | 0.56 (0.26, 0.81)                          | 0.45 (0.31, 0.61)*                           | 0.50 (0.37, 0.62)*                                  |
| p-trend             | 0.04                                                               | 0.16                                       | 0.006                                        | 0.02                                                |
| <b>Pregnancy</b>    |                                                                    |                                            |                                              |                                                     |
| Q1                  | 0.63 (0.51, 0.74)                                                  | 0.63 (0.31, 0.86)                          | 0.64 (0.48, 0.78)                            | 0.63 (0.50, 0.74)                                   |
| Q2                  | 0.54 (0.42, 0.67)                                                  | 0.60 (0.29, 0.84)                          | 0.56 (0.40, 0.71)                            | 0.54 (0.41, 0.66)                                   |
| Q3                  | 0.49 (0.37, 0.61)                                                  | 0.51 (0.22, 0.78)                          | 0.53 (0.37, 0.68)                            | 0.50 (0.38, 0.62)                                   |
| Q4                  | 0.47 (0.35, 0.60)                                                  | 0.41 (0.16, 0.72)                          | 0.31 (0.19, 0.47)*                           | 0.37 (0.26, 0.50)*                                  |
| p-trend             | 0.06                                                               | 0.09                                       | 0.006                                        | 0.004                                               |
| <b>Live birth</b>   |                                                                    |                                            |                                              |                                                     |
| Q1                  | 0.50 (0.37, 0.63)                                                  | 0.51 (0.22, 0.79)                          | 0.43 (0.27, 0.60)                            | 0.48 (0.35, 0.60)                                   |
| Q2                  | 0.39 (0.27, 0.53)                                                  | 0.44 (0.18, 0.74)                          | 0.50 (0.34, 0.67)                            | 0.41 (0.30, 0.54)                                   |
| Q3                  | 0.39 (0.27, 0.52)                                                  | 0.41 (0.16, 0.72)                          | 0.48 (0.32, 0.64)                            | 0.38 (0.27, 0.51)                                   |
| Q4                  | 0.38 (0.26, 0.51)                                                  | 0.34 (0.12, 0.66)                          | 0.26 (0.15, 0.43)                            | 0.31 (0.20, 0.43)*                                  |
| p-trend             | 0.20                                                               | 0.17                                       | 0.13                                         | 0.05                                                |

\*Significantly different from Q1 at the p=0.05 level

<sup>a</sup>205 women and 281 cycles

<sup>b</sup>201 women and 210 cycles

<sup>c</sup>140 women and 187 cycles

<sup>d</sup>211 women and 297 cycles, Adjusted model controls for maternal year of birth (continuous, mean=1974).

Adjusted models control for maternal age (continuous), body mass index (continuous), race/ethnicity (black/Asian/other, white/Caucasian), year of IVF treatment cycle (continuous), and primary SART infertility diagnosis at study entry (female, male, unknown). Adjusted means are presented for the mean maternal age (35.2), body mass index (23.9), race/ethnicity (white), year of IVF treatment cycle (2010), and primary SART infertility diagnosis at study entry (female=1, male=0, unexplained=0).

**Table S3. Unadjusted means (95% CI) for early developmental outcomes by quartile of urinary organophosphate flame retardant metabolite concentrations among 205 women undergoing 281 IVF cycles that had oocyte retrieval.**

|                                       | ΣPFRs              | BDCIPP             | DPHP               | ip-PPP             |
|---------------------------------------|--------------------|--------------------|--------------------|--------------------|
| <b>E2 trigger levels, pmol/L</b>      |                    |                    |                    |                    |
| Q1                                    | 1944 (1771, 2118)  | 2011 (1835, 2187)  | 1998 (1821, 2174)  | 2051 (1878, 2225)  |
| Q2                                    | 2173 (2001, 2345)  | 2065 (1892, 2238)  | 2095 (1919, 2270)  | 2122 (1952, 2293)  |
| Q3                                    | 2007 (1839, 2176)  | 2031 (1856, 2206)  | 2148 (1972, 2323)  | 2147 (1979, 2315)  |
| Q4                                    | 2142 (1966, 2318)  | 2156 (1979, 2333)  | 2022 (1843, 2202)  | 1944 (1766, 2121)  |
| p-trend                               | 0.22               | 0.29               | 0.88               | 0.49               |
| <b>Total oocytes, count</b>           |                    |                    |                    |                    |
| Q1                                    | 10.8 (9.7, 12.0)   | 9.9 (8.8, 11.0)    | 11.0 (9.9, 12.3)   | 10.9 (9.7, 12.1)   |
| Q2                                    | 11.1 (10.0, 12.3)  | 11.5 (10.3, 12.7)  | 11.1 (9.9, 12.3)   | 11.0 (9.9, 12.2)   |
| Q3                                    | 10.7 (9.6, 11.9)   | 11.2 (10.1, 12.5)  | 11.5 (10.3, 12.7)  | 12.0 (10.8, 13.2)  |
| Q4                                    | 11.9 (10.7, 13.3)  | 12.0 (10.8, 13.3)* | 10.9 (9.8, 12.2)   | 10.7 (9.5, 11.9)   |
| p-trend                               | 0.21               | 0.02               | 0.94               | 0.81               |
| <b>Total MII oocytes, count</b>       |                    |                    |                    |                    |
| Q1                                    | 9.3 (8.4, 10.4)    | 8.5 (7.6, 9.5)     | 9.3 (8.3, 10.4)    | 9.0 (8.0, 10.1)    |
| Q2                                    | 9.4 (8.4, 10.5)    | 9.4 (8.4, 10.5)    | 9.4 (8.4, 10.5)    | 9.4 (8.4, 10.5)    |
| Q3                                    | 8.7 (7.7, 9.7)     | 9.4 (8.4, 10.5)    | 9.5 (8.5, 10.6)    | 10.1 (9.1, 11.2)   |
| Q4                                    | 9.9 (8.9, 11.0)    | 9.9 (8.9, 11.1)*   | 9.0 (8.0, 10.0)    | 8.7 (7.7, 9.8)     |
| p-trend                               | 0.57               | 0.06               | 0.61               | 0.98               |
| <b>Fertilization, proportion</b>      |                    |                    |                    |                    |
| Q1                                    | 0.77 (0.72, 0.81)  | 0.75 (0.70, 0.79)  | 0.75 (0.70, 0.79)  | 0.77 (0.72, 0.81)  |
| Q2                                    | 0.72 (0.67, 0.76)  | 0.73 (0.68, 0.77)  | 0.68 (0.63, 0.73)* | 0.75 (0.71, 0.79)  |
| Q3                                    | 0.71 (0.66, 0.75)* | 0.71 (0.66, 0.76)  | 0.77 (0.73, 0.81)  | 0.71 (0.67, 0.75)  |
| Q4                                    | 0.70 (0.65, 0.74)* | 0.71 (0.66, 0.75)  | 0.68 (0.63, 0.73)* | 0.65 (0.60, 0.70)* |
| p-trend                               | 0.03               | 0.21               | 0.19               | 0.0004             |
| <b>Best quality embryos, count</b>    |                    |                    |                    |                    |
| Q1                                    | 1.7 (1.3, 2.1)     | 1.5 (1.1, 2.0)     | 1.6 (1.2, 2.1)     | 1.5 (1.1, 1.9)     |
| Q2                                    | 1.5 (1.2, 2.0)     | 1.3 (1.0, 1.7)     | 1.4 (1.1, 1.9)     | 1.8 (1.5, 2.3)     |
| Q3                                    | 1.4 (1.1, 1.8)     | 1.7 (1.3, 2.2)     | 1.7 (1.3, 2.2)     | 1.6 (1.2, 2.0)     |
| Q4                                    | 1.6 (1.2, 2.0)     | 1.6 (1.2, 2.1)     | 1.4 (1.1, 1.8)     | 1.2 (0.9, 1.6)     |
| p-trend                               | 0.70               | 0.45               | 0.69               | 0.30               |
| <b>Endometrial wall thickness, mm</b> |                    |                    |                    |                    |
| Q1                                    | 10.3 (9.83, 10.8)  | 10.2 (9.7, 10.7)   | 10.3 (9.8, 10.8)   | 10.2 (9.7, 10.7)   |
| Q2                                    | 10.3 (9.76, 10.8)  | 10.1 (9.6, 10.6)   | 10.2 (9.7, 10.7)   | 10.1 (9.6, 10.6)   |
| Q3                                    | 9.80 (9.32, 10.3)  | 9.9 (9.4, 10.4)    | 10.1 (9.6, 10.6)   | 9.7 (9.3, 10.2)    |
| Q4                                    | 9.97 (9.46, 10.5)  | 10.0 (9.5, 10.5)   | 9.8 (9.3, 10.3)    | 10.3 (9.8, 10.8)   |
| p-trend                               | 0.19               | 0.47               | 0.15               | 0.97               |

\*Significantly different from Q1 at the p=0.05 level

**Table S4.** Comparison of GM (95% CI) concentrations of urinary organophosphate flame retardant metabolites ( $\mu\text{g/L}$ ).

| Region (sample size)                    | Year      | BDCIPP                         | DPHP                          | ip-PPP            | Reference                  |
|-----------------------------------------|-----------|--------------------------------|-------------------------------|-------------------|----------------------------|
| Massachusetts (n=211)                   | 2005-2015 | 0.70 (0.63, 0.77)              | 0.81 (0.75, 0.89)             | 0.24 (0.22, 0.26) | This study                 |
| California (n=28)                       | 2015      | 3.3 (2.5, 4.2)                 | 1.2 (0.97, 1.5)               | 2.0 (1.5, 2.5)    | Butt et al. (2016)         |
| New Jersey (n=22)                       | 2013-2014 | 2.4 (1.5, 3.7)                 | 1.9 (1.1, 3.4)                | 0.85 (0.67, 1.1)  | Butt et al. (2014)         |
| North Carolina (n=53)                   | 2012      | 0.63 (0.49, 0.81) <sup>a</sup> | 1.7 (1.36, 2.18) <sup>a</sup> | NR                | Hoffman et al. (2015)      |
| United States (n=9)                     | 2011      | 0.41 (NR)                      | 3.0 (NR)                      | NR                | Cooper et al. (2011)       |
| Massachusetts (n=29)                    | 2009      | 0.41 (0.28-0.59)               | 1.9 (1.2-3.0) <sup>b</sup>    | NR                | Carignan et al. (2013)     |
| Massachusetts (n=45)                    | 2002-2007 | 0.13 (NR)                      | 0.31 (NR)                     | NR                | Meeker et al. (2013)       |
| California (n=14)                       | 2011      | 0.09 <sup>c</sup> (NR)         | 0.44 <sup>c</sup> (NR)        | NR                | Dodson et al. (2014)       |
| Norway (n=48) <sup>d</sup>              | 2012      | 0.12 <sup>d</sup> (NR)         | 0.51 <sup>d</sup> (NR)        | NR                | Cequier et al. (2015)      |
| Australia (n=3224, pooled) <sup>e</sup> | 2010-2013 | 1.00, 0.66 <sup>e</sup>        | 24.4, 64.4 <sup>e</sup>       | NR                | Van den Eede et al. (2015) |

Normalized using a mean specific gravity of 1.024 unless otherwise indicated

NR=Not reported

<sup>a</sup>Confidence interval obtained from study authors, n=52 for TBBA

<sup>b</sup>Previously unpublished data obtained from the authors

<sup>c</sup>Not SG normalized, median concentrations

<sup>d</sup>Normalized using a mean specific gravity of 1.015, 244 urine samples total

<sup>e</sup>Not SG normalized, GMs for two sampling campaigns (2010-2011 and 2012-2013)

## REFERENCES

- Butt CM, Congleton J, Hoffman K, Fang M, Stapleton HM. 2014. Metabolites of organophosphate flame retardants and 2-ethylhexyl tetrabromobenzoate in urine from paired mothers and toddlers. *Environ Sci Technol* 48:10432-10438.
- Butt CM, Hoffman K, Chen A, Lorenzo A, Congleton J, Stapleton HM. 2016. Regional comparison of organophosphate flame retardant (PFR) urinary metabolites and tetrabromobenzoic acid (TBBA) in mother-toddler pairs from California and New Jersey. *Environ Int* 94:627-634.
- Carignan CC, McClean MD, Cooper EM, Watkins DJ, Fraser AJ, Heiger-Bernays W, et al. 2013. Predictors of tris(1,3-dichloro-2-propyl) phosphate metabolite in the urine of office workers. *Environ Int* 55:56-61.
- Cequier E, Sakhi AK, Marce RM, Becher G, Thomsen C. 2015. Human exposure pathways to organophosphate triesters - a biomonitoring study of mother-child pairs. *Environ Int* 75:159-165.
- Cooper EM, Covaci A, van Nuijs ALN, Webster TF, Stapleton HM. 2011. Analysis of the flame retardant metabolites bis(1,3-dichloro-2-propyl) phosphate (BDCPP) and diphenyl phosphate (DPP) in urine using liquid chromatography-tandem mass spectrometry. *Anal Bioanal Chem* 401:2123-2132.
- Dodson RE, Van den Eede N, Covaci A, Perovich LJ, Brody JG, Rudel RA. 2014. Urinary biomonitoring of phosphate flame retardants: levels in California adults and recommendations for future studies. *Environ Sci Technol* 48:13625-13633.
- Hoffman K, Garantziotis S, Birnbaum LS, Stapleton HM. 2015. Monitoring indoor exposure to organophosphate flame retardants: hand wipes and house dust. *Environ Health Perspect* 123:160-165.
- Meeker JD, Cooper EM, Stapleton HM, Hauser R. 2013. Urinary metabolites of organophosphate flame retardants: temporal variability and correlations with house dust concentrations. *Environ Health Perspect* 121:580-585.
- Van den Eede N, Heffernan AL, Aylward LL, Hobson P, Neels H, Mueller JF, et al. 2015. Age as a determinant of phosphate flame retardant exposure of the Australian population and identification of novel urinary PFR metabolites. *Environ Int* 74:1-8.
